# Supplementary material for: On Stabilizing the Variance of Dynamic Functional Brain Connectivity Time Series
Source: PubMed Central journal article supplement — Brain Connect. 2016 Dec 1;6(10):735–46. doi: 10.1089/brain.2016.0454 (PMC5175424; doi:10.1089/brain.2016.0454), 2016-12-01
Supplement: Supp_Fig1.pdf [file Supp_Fig1.pdf]

## Supplementary Data

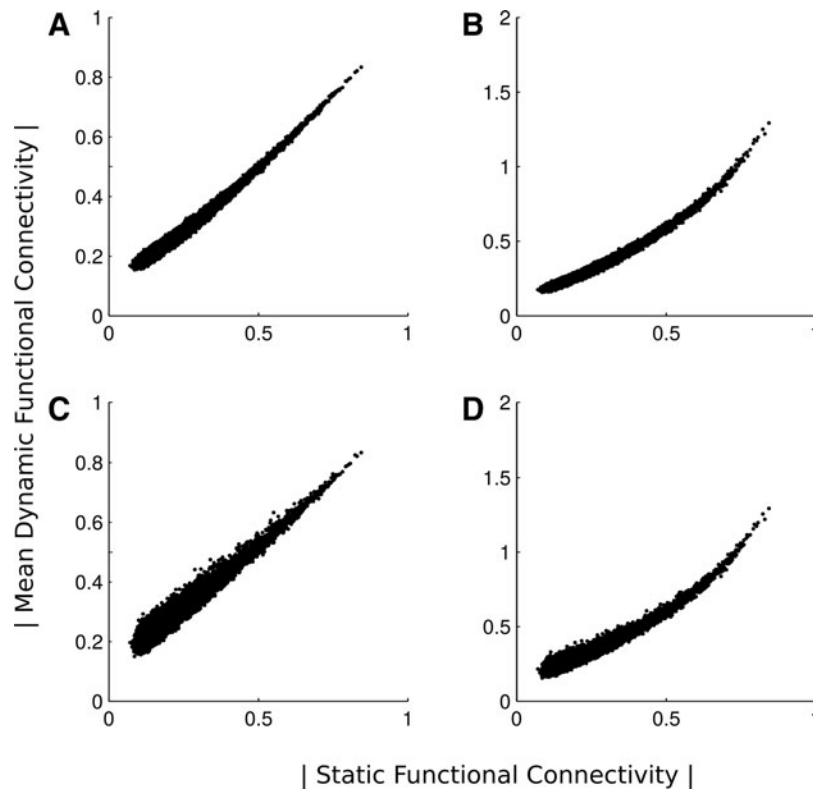

**SUPPLEMENTARY FIG. S1.** Absolute static functional connectivity shows a strong relationship with the mean of absolute dFC time series following different variance-stabilizing transformations. Each point shows an edge averaged over all subjects. Each panel shows the static functional connectivity versus (A) the raw dynamic functional connectivity time series; (B) Fisher-transformed connectivity values; (C) Box–Cox transformed; (D) Fisher followed by the Box–Cox transformation. dFC, dynamic functional connectivity.
